# Supplementary material for: Distinct roles of two myosins in C. elegans spermatid differentiation
Source: PLoS Biol. 2019 Apr 16;17(4):e3000211. doi: 10.1371/journal.pbio.3000211 (PMC6485759; doi:10.1371/journal.pbio.3000211)
Supplement: S1 Data — (XLSX) [file pbio.3000211.s022.xlsx]

## Sheet: Fig_3A,3B
		Number of RBs that contain mitochondria in three different ranges
		25℃			20℃
	Genotype	him-5	nmy-2(ne3409);him-5		him-5			spe-15(hc75);him-5
No. of mitochondria					early stage	late stage		early stage	late stage
0-4		20	4		19	19		14	0
5-10		0	6		1	1		6	3
>10		0	10		0	0		0	17
	Total	20	20		20	20		20	20
		% of RBs that contain mitochondria in three different ranges
		25℃			20℃
	Genotype	him-5	nmy-2(ne3409);him-5		him-5			spe-15(hc75);him-5
No. of mitochondria					early stage	late stage		early stage	late stage
0-4		1	0.2		0.95	0.95		0.7	0
5-10		0	0.3		0.05	0.05		0.3	0.15
>10		0	0.5		0	0		0	0.85

## Sheet: S1B_Fig
Time required for each step during in vitro culture (min)
Steps	ingression	expassion	cytokinesis	ingression	expassion	cytokinesis	ingression	expassion	cytokinesis
Conditions	him-5			him-5 stained with sir-tubulin			him-5 stained with sir-actin
Duration time （min）	10	6.5	27.5	7	7	33	5	6	62
	8	9	41	7	10	18	13	7	30
	2	3	35	7	9	23	5	6	34
	8.5	8	33.5	5	5	24
	13	7	40	6	10	23
	8	6.5	30.5
ave.	8.25	6.66667	34.5833	6.4	8.2	24.2	7.66667	6.33333	42
s.d.	3.28824	1.86339	4.80812	0.8	1.93907	4.87442	3.77124	0.471405	14.2361

## Sheet: S3B_Fig
Normalized intensity of RPL-5::GFP in spermatids
Genotype	him-5	gipc-1;gipc-2;him-5	spe-15(qx529);him-5	spe-15(hc75);him-5
Normalized intensity	1.38242	21.8025	71.5921	52.7976
	1.82944	19.6723	47.7865	50.2136
	0.446289	7.70395	34.5205	50.6225
	1.59426	9.26703	59.0274	46.2676
	1.14037	9.11818	44.7713	53.1271
	0.837061	18.7757	56.4414	78.7637
	0.175785	10.3494	57.2176	68.3036
	0.633132	14.6658	59.4496	48.2836
	1.19308	10.4676	37.3871	52.8225
	0.251305	12.1248	55.7373	50.0268
	0.819311	9.35469	53.9826	70.3073
	0.891748	14.6961	34.6149	73.1424
	0.261724	19.2682	53.962	73.1488
	0.421669	14.9098	52.1348	53.3879
	0.357886	7.73774	34.7414	67.6279
	0.174217	8.8257	51.5636	52.4236
	0.600497	12.7862	40.0408	59.8473
	0.732054	13.6141	52.3338	52.8083
	0.648966	11.1974	41.5732	54.1988
	0.80681	6.5924	36.502	78.3774
	0.945388	9.37761	58.9572	61.6252
	0.564416	7.14786	48.3235	47.314
	1.41246	11.2648	40.6747	51.1737
	0.518595	7.40262	41.6861	56.8049
	1.63454	14.0467	45.0917	58.5281
	1.38672	7.55225	37.2856	43.0755
	0.449174	9.44753	38.7821	70.3809
	0.136247	18.8305	44.1962	51.7258
	1.61451	25.4385	42.2779	75.8909
	0.943524	7.95618	44.5761	41.4261
	2.4318	18.6056	40.1734	44.996
	2.28087	10.9703	70.8697	40.8064
	2.44848	9.58462	52.9396	58.0744
	2.41259		45.7283	54.2578
	0.622653		69.333	43.6704
			51.3784
			60.787
ave.	1	12.441	48.8768	56.75
s.d.	0.673279	4.78158	10.0514	10.7652

## Sheet: S3C_Fig
Normalized intensity of actin/tubulin in spermatids
Genotype	him-5		gipc-1;gipc-2;him-5		spe-15(qx529);him-5		spe-15(hc75);him-5
Actin/tubulin	actin	tubulin	actin	tubulin	actin	tubulin	actin	tubulin
Normalized intensity	0.724569	0.924536	5.12515	2.07534	18.2402	11.3336	35.2953	27.6608
	1.2942	1.25659	2.70066	2.68833	43.9143	21.1056	48.009	26.9514
	1.28573	1.28672	2.92551	2.69269	32.5365	12.9105	37.3464	17.9978
	0.715799	0.745714	3.50842	3.0981	61.1961	15.2015	35.1499	40.6356
	0.634359	0.614211	3.50515	3.00623	53.7636	21.3376	62.1623	42.7059
	1.05748	1.14109	1.79875	2.4309	61.0924	15.4129	24.9551	22.9476
	1.03353	0.935708	2.55116	1.70079	52.518	9.95741	22.1466	46.6808
	0.720685	1.03867	2.2488	1.76971	26.3204	12.3966	18.0153	36.9424
	0.908547	1.06319	1.99456	1.84467	64.087	22.0949	20.9696	20.1346
	1.24439	1.30161	2.43884	1.73064	44.3674	29.721	32.5904	25.9452
	0.998784	0.884797	4.64044	4.07468	42.4732	17.5503	38.0647	11.5206
	1.44753	1.15928	3.54149	2.51126	30.3965	26.3327	44.3965	33.5338
	1.26165	0.975271	3.05196	2.50661	33.7604	11.9225	63.2858	13.7717
	1.13268	1.34235	1.37757	3.11404	34.1036	21.1679	23.7679	12.5685
	0.829376	1.3491	3.84275	4.0436	17.5643	16.4417	14.2392	25.1752
	0.990468	0.825218	4.88652	4.14633	25.5647	10.8412	31.8256	20.6757
	0.645749	0.672881	6.95618	3.37287	24.3346	21.7993	78.3548	20.6576
	1.70175	0.969131	2.4112	6.51589	45.4308	17.4902	43.6625	20.9259
	1.38948	0.951286	3.76454	2.65565	46.2712	17.7061	23.6623	18.9976
	0.793973	0.552576	2.11188	1.22959	43.5811	22.205	28.3519	45.401
	0.782857	0.455124	2.91767	1.4594	54.2421	16.0438	43.8444	36.0536
	1.11773	0.708481	3.19489	1.09332	54.125	19.7887	45.2711	18.6726
	0.971561	1.20557	2.4157	1.32395	33.5594	12.8327	29.7954	21.9477
	0.719587	0.929313	2.51989	2.03233	35.3808	10.1251	47.1348	25.1279
	0.63827	0.59846	3.26329	3.21852	23.9619	10.107	33.879	15.283
	0.749921	1.3468	3.1827	2.70558	31.7132	16.1854	24.7913	29.6444
	1.19675	0.997281	6.5515	3.11461	41.3132	9.99807	45.4576	36.3943
	1.25127	1.28815	2.92193	3.47858	52.8987	19.3774	19.8087	13.8367
	1.05118	1.34122	1.06701	3.68047	59.1671	15.0085	47.668	17.5841
	0.710168	1.13967	2.04234	3.39794	57.8602	14.8167	25.1615	25.717
			1.84032	3.80179	67.674	15.8396	55.6787	24.2091
			3.79159	2.53394	23.3041	6.57875
			2.12066	3.54449	39.0041	9.11814
			5.18048	2.82037	40.7311	9.2929
			4.46599	2.69325	15.5221	9.08245
			4.08317	3.33485	44.0593	18.2285
			2.07726	2.34659	57.2401	17.2157
			3.06285	2.97062	23.2149	23.4359
					22.7616	5.06159
					40.4054	3.65023
					20.2323	5.98762
					24.8118	6.85988
					29.1813	4.77851
					21.5656	4.70185
					17.2349	3.4321
					10.0208	5.83995
					10.3018	7.42706
					23.4964	3.31677
					10.7876	12.7702
					17.2051	12.1275
					34.1695	4.93133
					16.5538	8.17489
					15.2526	7.39735
					18.6958	6.80008
					14.0384	8.91637
					24.5919	10.0921
ave.	1	1	3.21265	2.80943	34.4249	13.0405	36.9272	25.6871
s.d.	0.274408	0.26056	1.29645	1.00695	15.7032	6.2963	14.6307	9.64598

## Sheet: S3F_Fig
Normalized intensity of NMY-2::GFP in spermatids
Genotype	him-5	gipc-1;gipc-2;him-5	spe-15(hc75);him-5
Normalized intensity	1.44691	1.98028	3.18899
	1.10418	2.12535	5.96149
	1.15067	1.8017	3.75821
	1.26435	1.55267	5.75875
	1.18217	1.46331	3.48446
	1.45945	2.626	3.54686
	0.792628	3.31698	4.22275
	0.957696	2.25398	4.62233
	1.29128	1.70947	6.00026
	0.692862	2.34143	4.25227
	1.00698	1.47091	5.21402
	1.14821	1.70619	5.93268
	0.93477	3.00946	3.60002
	0.837222	2.59036	4.84733
	0.663961	2.65319	3.74037
	0.679743	2.07463
	1.04898	2.00313
	0.820679	1.72513
	0.774007	2.3243
	0.743234	1.92444
ave.	1	2.13265	4.54205
s.d.	0.244053	0.496786	0.979003

## Sheet: S5B_Fig
% of RBs containing nuclei
Genotype	ced-1;him-5	ced-1;gipc-1;gipc-2;him-5	spe-15(qx529) ced-1;him-5	spe-15(hc75) ced-1;him-5
Number of RBs without nuclei	47	11	0	0
Number of RBs containing nuclear	3	47	51	59
Total	50	58	51	59
% of RBs containing nuclei	0.06	0.810345	1	1

## Sheet: S5C_Fig
Number of spermatids with different shapes after in vitro activation
Genotype	Long pseudopod	Short pseudopod	Round	Irregular	Total
him-5	310	27	1	1	339
gipc-1;gipc-2;him-5	123	139	60	9	331
spe-15(qx529);him-5	4	41	245	28	318
spe-15(hc75);him-5	12	16	209	49	286
% of spermatids with different shapes after in vitro activation
Genotype	Long pseudopod	Short pseudopod	Round	Irregular
him-5	0.914454	0.079646	0.00294985	0.00294985
gipc-1;gipc-2;him-5	0.371601	0.41994	0.181269	0.0271903
spe-15(qx529);him-5	0.0125786	0.128931	0.77044	0.0880503
spe-15(hc75);him-5	0.041958	0.0559441	0.730769	0.171329

## Sheet: S5D_Fig
Number of self progeny
Genotype	N2	gipc-1;gipc-2	spe-15(qx529)	spe-15(qx529);gipc-1;gipc-2	spe-15(hc75)	spe-15(ok153)
Number of self progeny	226	43	20	27	2	12
	300	29	22	17	6	7
	161	54	3	15	2	0
	335	30	20	3	10	15
	87	62	0	6	5	13
	282	24	16	11	13	5
	303	71	9	17	11	2
	338	52	12	16	20	0
	232	55	0	14	7	0
	317	87	27	9	7	35
	405	28	0	16	2	2
	349	46	35	13	4	7
	300	63	44	8	12	19
	311	46	22	11	23	0
	347	45	6	4	15	0
	331	56	49	20	7	0
	371	82	32	16	10	0
	358	40	22	14	29	1
	363	40	31	7	6	0
	225	28		16	6	1
		51
		70
		0
		0
		48
		61
		34
		87
		47
		38
		25
		40
		56
		37
		49
		71
		55
		61
		36
		56
ave.	297.05	47.575	19.4737	13	9.85	5.95
s.d.	75.041	19.2599	14.2325	5.63028	7.05886	8.80043

## Sheet: S5E_Fig
Number of cross progeny (eggs laid within 24h)
Genotype	N2	gipc-1;gipc-2	spe-15(hc75)	spe-15(ok153)
Number of cross progeny (eggs laid within 24h)	124	108	102	108
	132	125	98	115
	118	114	128	112
	128	123	115	128
	115	108	96	125
	121	116	125	116
	125	109	102	110
	135	123	105	108
ave.	124.75	115.75	108.875	115.25
s.d.	6.35905	6.70354	11.4939	7.08431

## Sheet: S5F_Fig
% of unfertilized eggs
Genotype	N2	gipc-1;gipc-2	spe-15(qx529)	spe-15(qx529);gipc-1;gipc-2	spe-15(hc75)	spe-15(ok153)
% of unfertilized eggs	24.9169	79.9065	88.6364	82.6923	97.6744	91.6667
	11.2426	75	93.1464	92.2374	97.3799	94.5737
	16.1458	68.6047	97.0297	89.6552	98.5294	100
	10.4278	9.09091	91.9355	95.7746	88.6364	90.6832
	0	57.8231	100	94.7826	94.4444	79.3651
	15.8209	65.7143	83.8384	87.0588	85.8696	91.0714
	7.05521	22.8261	86.7647	88.1119	92.1429	95.1219
	18.1598	80.8118	95.7447	80.9524	87.5776	100
	13.7546	52.9915	100	89.2308	84.7826	100
	6.21302	48.2143	76.9231	92.6829	96.789	71.3115
	15.0943	67.4419	100	94.8387	91.3043	98.6667
	9.35065	68.4931	81.2834	84.7059	98.1735	91.358
	9.09091	23.1707	84.7751	87.5	94.6903	88.8235
	17.0667	51.0638	79.0476	92.4138	89.2523	100
	4.14365	86.1963	88	93.5484	73.6842	100
	9.31507	62.4161	84.3949	90.6977	96.8037	100
	17.0022	44.2177	87.451	88.0597	84.375	100
	7.01299	57.4468	89.9083	79.7101	58.5714	92.8571
	15.5814	39.3939	86.1607	94.2623	83.3333	100
	26.4706	84.7826		91.0614	94.6429	85.7143
		34.6154
		67.7419
		100
		100
		67.7852
		81.0559
		86.0082
		39.1608
		74.4565
		64.1509
		90.0794
		56.044
		75.1111
		80.9278
		51
		68.1614
		76.7933
		35.1064
		79.8883
		73.7089
ave.	12.6933	63.685	89.2126	89.4989	89.4329	93.5607
s.d.	6.42964	20.7962	6.82672	4.56686	9.46329	7.63286
